# Supplementary material
Source: Springer Nature journal article supplement (https://www.springermedizin.de/resource/supplementary/12882_2013_780_MOESM1_ESM.pdf/9454698)

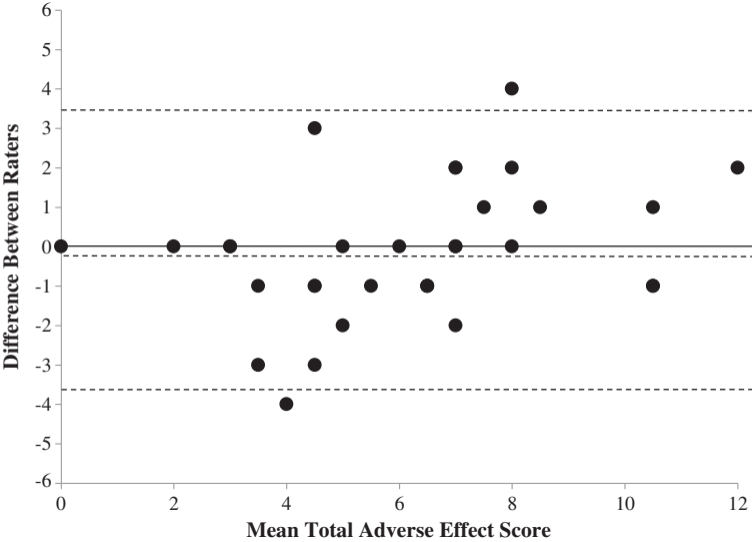

Supplement: MOESM1 [file 9454698]
